# Supplementary material
Source: PubMed Central journal article supplement (PMC5836743)
Supplement: NIHMS940643-supplement-supplement_1.pdf [file NIHMS940643-supplement-supplement_1.pdf]

## Supplementary Appendix Tables

SA Table 1 Cross sectional bivariate wave by wave association with IPV accept and IPV experience past 6 months, stratified by group

|                       | Treatment |      |      | Control |      |      |
|-----------------------|-----------|------|------|---------|------|------|
|                       | Beta      | SE   | P    | Beta    | SE   | P    |
| Man accepts IPV WV1   | 0.11      | 0.40 | 0.77 | -0.03   | 0.34 | 0.93 |
| Woman accepts IPV WV1 | 1.74      | 0.62 | 0.01 | 1.10    | 0.40 | 0.01 |
| Man accepts IPV WV2   | 0.48      | 0.30 | 0.12 | 0.96    | 0.25 | 0.00 |
| Woman accepts IPV WV2 | 0.03      | 0.31 | 0.93 | -0.65   | 0.26 | 0.01 |
| Man accepts IPV WV3   | 0.34      | 0.33 | 0.31 | 0.55    | 0.25 | 0.03 |
| Woman accepts IPV WV3 | -0.12     | 0.35 | 0.72 | -0.48   | 0.28 | 0.09 |

SA Table 2 Bivariate association between socio-demographic predictors and women's IPV acceptance Wave 1

|                              | WAVE 1 Treatment |      |      |
|------------------------------|------------------|------|------|
|                              | Beta             | SE   | P    |
| Father perpetrated IPV Women | 1.25             | 0.28 | 0.00 |
| Number of children           | 0.46             | 0.14 | 0.00 |
| Arranged Marriage            | -0.35            | 0.26 | 0.18 |
| Married years                | 0.11             | 0.04 | 0.01 |
| Women's income production    | 0.53             | 0.30 | 0.08 |
| Women's education            | -0.08            | 0.03 | 0.01 |
| Women's age                  | 0.01             | 0.04 | 0.74 |
| Men's education              | -0.05            | 0.03 | 0.14 |
| Men's age                    | -0.03            | 0.04 | 0.46 |
| Caste                        | 0.74             | 0.72 | 0.3  |
| Caste                        | 0.3              | 0.73 | 0.68 |
| Caste                        | 0.29             | 0.89 | 0.75 |
| Food insecurity              | 0.38             | 0.43 | 0.38 |
| House size                   | -0.15            | 0.07 | 0.05 |

SA Table 3 Bivariate association between mens IPV acceptance and women's, by WV, binary model

|                        | Treatment   |             |             | Control     |             |             |
|------------------------|-------------|-------------|-------------|-------------|-------------|-------------|
|                        | Beta        | SE          | P           | Beta        | SE          | P           |
| Man accepts WV1        | -0.21       | 0.23        | 0.37        | -0.18       | 0.21        | 0.41        |
| Man accepts WV2        | -0.18       | 0.22        | 0.43        | -0.28       | 0.20        | 0.16        |
| <b>Man accepts WV3</b> | <b>0.51</b> | <b>0.23</b> | <b>0.03</b> | <b>0.37</b> | <b>0.21</b> | <b>0.08</b> |

SA Table 4 Proportion of men who perpetrate IPV by category of initial IPV perpetration

|                      | Treatment  |            | Control    |            |
|----------------------|------------|------------|------------|------------|
|                      | IPV Wave 2 | IPV Wave 3 | IPV Wave 2 | IPV Wave 3 |
| <b>No IPV Wave 1</b> | 0.11       | 0.10       | 0.16       | 0.17       |
| <b>IPV Wave 1</b>    | 0.50       | 0.40       | 0.50       | 0.40       |
| No IPV Wave 1 or 2   |            | 0.07       |            | 0.14       |
| IPV Wave 1 only      |            | 0.40       |            | 0.24       |
| IPV Wave 2 only      |            | 0.33       |            | 0.34       |
| IPV Wave 1 and 2     |            | 0.40       |            | 0.55       |

SA Table 5 Proportion of men who support IPV by IPV perpetration category and treatment group

|                  | Intervention group |             |             |             |             |             |
|------------------|--------------------|-------------|-------------|-------------|-------------|-------------|
|                  | Treatment          |             |             | Control     |             |             |
|                  | WV1                | WV2         | WV3         | WV1         | WV2         | WV3         |
| IPV Wave 2 only  | <b>0.83</b>        | <b>0.52</b> | <b>0.42</b> | <b>0.70</b> | <b>0.62</b> | <b>0.60</b> |
| IPV Wave 1 and 2 | <b>0.73</b>        | <b>0.40</b> | <b>0.53</b> | <b>0.73</b> | <b>0.68</b> | <b>0.64</b> |
| IPV Wave 3 only  | <b>0.80</b>        | <b>0.55</b> | <b>0.40</b> | <b>0.58</b> | <b>0.49</b> | <b>0.56</b> |

CONNELL, R. **Gender and Power** Stanford CA: Stanford University Press 1987.

GHULE, M. et al. Barriers to contraceptive methods among rural young married couples in Maharashtra, India: Qualitative findings. **Asian Journal of Research in Social Sciences and Humanities**, v. in press, 2015.

WHO DEPARTMENT OF GENDER, W., AND HEALTH **Putting women first: Ethical and safety recommendations for research on domestic violence against women.**

[http://apps.who.int/iris/bitstream/10665/65893/1/WHO\\_FCH\\_GWH\\_01.1.pdf](http://apps.who.int/iris/bitstream/10665/65893/1/WHO_FCH_GWH_01.1.pdf). Geneva Switzerland 2001
